# Supplementary material
Source: PubMed Central journal article supplement (PMC3973511)
Supplement: SD2.pdf [file SD2.pdf]

SUPPLEMENTAL TABLE 1

Prevalence and intensity of *Trichuris trichiura* infection in inhabitants in Bokeo Province

| Age group (year) | N   | Sex number |     | Positive |   | Light intensity |   | Moderate intensity |   | High intensity |   |
|------------------|-----|------------|-----|----------|---|-----------------|---|--------------------|---|----------------|---|
|                  |     | M          | F   | M        | F | M               | F | M                  | F | M              | F |
| 2-5              | 81  | 42         | 39  | 1        | 1 | 1               | 1 |                    |   |                |   |
| 6-10             | 161 | 80         | 81  | 2        | 2 | 2               | 2 |                    |   |                |   |
| 11-14            | 112 | 58         | 54  | 3        | 4 | 3               | 4 |                    |   |                |   |
| 15 <~            | 183 | 85         | 98  | 2        | 1 | 2               | 1 |                    |   |                |   |
| Total            | 537 | 265        | 272 | 8        | 8 | 8               | 8 |                    |   |                |   |
|                  |     | 537        |     | 16/3%    |   | 16/100%         |   |                    |   |                |   |

Prevalence and intensity of *Ascaris lumbricoides* infection in inhabitants in Bokeo Province

| Age group (year) | N   | Sex number |     | Positive |    | Light intensity |    | Moderate intensity |   | High intensity |   |
|------------------|-----|------------|-----|----------|----|-----------------|----|--------------------|---|----------------|---|
|                  |     | M          | F   | M        | F  | M               | F  | M                  | F | M              | F |
| 2-5              | 81  | 42         | 39  | 2        | 2  | 1               | 2  | 1                  |   |                |   |
| 6-10             | 161 | 80         | 81  | 13       | 8  | 10              | 5  | 3                  | 3 |                |   |
| 11-14            | 112 | 58         | 54  | 10       | 7  | 10              | 6  | 0                  | 1 |                |   |
| 15 <~            | 183 | 85         | 98  | 1        | 2  | 0               | 2  | 1                  |   |                |   |
| Total            | 537 | 265        | 272 | 26       | 19 | 21              | 15 | 5                  | 4 |                |   |
|                  |     | 537        |     | 45/8,4%  |    | 36/80%          |    | 9/20%              |   |                |   |

## Prevalence and intensity of hookworm infection in inhabitants in Bokeo Province

| Age group (year) | N   | Sex number |     | Positive |    | Light intensity |    | Moderate intensity |   | High intensity |   |
|------------------|-----|------------|-----|----------|----|-----------------|----|--------------------|---|----------------|---|
|                  |     | M          | F   | M        | F  | M               | F  | M                  | F | M              | F |
| 2-5              | 81  | 42         | 39  | 1        | 5  | 1               | 5  |                    |   |                |   |
| 6-10             | 161 | 80         | 81  | 13       | 11 | 13              | 11 |                    |   |                |   |
| 11-14            | 112 | 58         | 54  | 6        | 5  | 6               | 5  |                    |   |                |   |
| 15 <~            | 183 | 85         | 98  | 18       | 22 | 18              | 22 |                    |   |                |   |
| Total            | 537 | 265        | 272 | 38       | 43 | 38              | 43 |                    |   |                |   |
|                  |     | 537        |     | 81/15,1% |    | 81/100%         |    |                    |   |                |   |

## Prevalence and intensity of miscellaneous trematodes infections in inhabitants in Houaphan Province

| Age group (year) | N   | Sex number |     | Positive |   | Light intensity |   | Moderate intensity |   | High intensity |   |
|------------------|-----|------------|-----|----------|---|-----------------|---|--------------------|---|----------------|---|
|                  |     | M          | F   | M        | F | M               | F | M                  | F | M              | F |
| 2-5              | 34  | 19         | 15  |          |   |                 |   |                    |   |                |   |
| 6-10             | 117 | 69         | 48  |          |   |                 |   |                    |   |                |   |
| 11-14            | 86  | 43         | 43  |          | 1 |                 | 1 |                    |   |                |   |
| 15 <~            | 543 | 281        | 262 |          |   |                 |   |                    |   |                |   |
| Total            | 780 | 412        | 368 |          |   |                 |   |                    |   |                |   |
|                  |     | 780        |     | 1        |   | 1               |   |                    |   |                |   |

Prevalence and intensity of *Ascaris lumbricoides* infection in inhabitants in Houaphan Province

| Age group (year) | N   | Sex number |     | Positive  |     | Light intensity |     | Moderate intensity |   | High intensity |   |
|------------------|-----|------------|-----|-----------|-----|-----------------|-----|--------------------|---|----------------|---|
|                  |     | M          | F   | M         | F   | M               | F   | M                  | F | M              | F |
| 2-5              | 34  | 19         | 15  | 6         | 6   | 6               | 6   |                    |   |                |   |
| 6-10             | 117 | 69         | 48  | 21        | 20  | 20              | 19  | 1                  | 1 |                |   |
| 11-14            | 86  | 43         | 43  | 13        | 13  | 13              | 13  |                    |   |                |   |
| 15 <~            | 543 | 281        | 262 | 81        | 92  | 81              | 91  |                    | 1 |                |   |
| Total            | 780 | 412        | 368 | 121       | 131 | 120             | 129 | 1                  | 2 |                |   |
|                  |     | 780        |     | 252/32,3% |     | 249/98,8%       |     | 3/1,2%             |   |                |   |

## Prevalence and intensity of hookworm infection in inhabitants in Houaphan Province

| Age group (year) | N   | Sex number |     | Positive  |    | Light intensity |    | Moderate intensity |   | High intensity |   |
|------------------|-----|------------|-----|-----------|----|-----------------|----|--------------------|---|----------------|---|
|                  |     | M          | F   | M         | F  | M               | F  | M                  | F | M              | F |
| 2-5              | 34  | 19         | 15  | 1         | 1  |                 |    |                    |   |                |   |
| 6-10             | 117 | 69         | 48  | 5         | 5  | 5               | 4  |                    | 1 |                |   |
| 11-14            | 86  | 43         | 43  | 4         | 9  | 3               | 9  | 1                  |   |                |   |
| 15 <~            | 543 | 281        | 262 | 51        | 52 | 50              | 50 | 1                  | 2 |                |   |
| Total            | 780 | 412        | 368 | 61        | 67 | 58              | 63 | 2                  | 3 |                |   |
|                  |     | 780        |     | 128/16,4% |    | 121/ 94,5%      |    | 5/5,5%             |   |                |   |

(continued)

SUPPLEMENTAL TABLE 1

Continued

| Prevalence and intensity of <i>Trichuris trichiura</i> infection in inhabitants in Houaphan Province |     |            |     |           |     |                 |     |                    |   |                |   |
|------------------------------------------------------------------------------------------------------|-----|------------|-----|-----------|-----|-----------------|-----|--------------------|---|----------------|---|
| Age group (year)                                                                                     | N   | Sex number |     | Positive  |     | Light intensity |     | Moderate intensity |   | High intensity |   |
|                                                                                                      |     | M          | F   | M         | F   | M               | F   | M                  | F | M              | F |
| 2-5                                                                                                  | 34  | 19         | 15  | 5         | 4   | 5               | 4   |                    |   |                |   |
| 6-10                                                                                                 | 117 | 69         | 48  | 16        | 16  | 16              | 16  |                    |   |                |   |
| 11-14                                                                                                | 86  | 43         | 43  | 15        | 16  | 15              | 16  |                    |   |                |   |
| 15 <~                                                                                                | 543 | 281        | 262 | 107       | 112 | 107             | 112 |                    |   |                |   |
| Total                                                                                                | 780 | 412        | 368 | 143       | 148 | 143             | 148 |                    |   |                |   |
|                                                                                                      |     | 780        |     | 291/37,3% |     | 291/100%        |     |                    |   |                |   |

  

| Prevalence and intensity of miscellaneous trematodes infection in inhabitants in Luang Namtha Province |     |            |     |          |   |                 |   |                    |   |                |   |
|--------------------------------------------------------------------------------------------------------|-----|------------|-----|----------|---|-----------------|---|--------------------|---|----------------|---|
| Age group (year)                                                                                       | N   | Sex number |     | Positive |   | Light intensity |   | Moderate intensity |   | High intensity |   |
|                                                                                                        |     | M          | F   | M        | F | M               | F | M                  | F | M              | F |
| 2-5                                                                                                    | 21  | 11         | 10  |          |   |                 |   |                    |   |                |   |
| 6-10                                                                                                   | 193 | 88         | 105 |          | 1 |                 | 1 |                    |   |                |   |
| 11-14                                                                                                  | 128 | 70         | 58  |          |   |                 |   |                    |   |                |   |
| 15 <~                                                                                                  | 98  | 41         | 57  | 1        |   | 1               |   |                    |   |                |   |
| Total                                                                                                  | 440 | 210        | 230 | 1        | 1 | 1               | 1 |                    |   |                |   |
|                                                                                                        |     | 440        |     | 2/0,5%   |   | 2               |   |                    |   |                |   |

  

| Prevalence and intensity of <i>Ascaris lumbricoides</i> infection in inhabitants in Luang Namtha Province |     |            |     |           |    |                 |    |                    |   |                |   |
|-----------------------------------------------------------------------------------------------------------|-----|------------|-----|-----------|----|-----------------|----|--------------------|---|----------------|---|
| Age group (year)                                                                                          | N   | Sex number |     | Positive  |    | Light intensity |    | Moderate intensity |   | High intensity |   |
|                                                                                                           |     | M          | F   | M         | F  | M               | F  | M                  | F | M              | F |
| 2-5                                                                                                       | 21  | 11         | 10  | 3         | 0  | 3               | 0  |                    |   |                |   |
| 6-10                                                                                                      | 193 | 88         | 105 | 17        | 16 | 13              | 15 | 3                  | 1 | 1              | 0 |
| 11-14                                                                                                     | 128 | 70         | 58  | 12        | 11 | 8               | 11 | 4                  | 0 |                |   |
| 15 <~                                                                                                     | 98  | 41         | 57  | 5         | 9  | 5               | 9  |                    |   |                |   |
| Total                                                                                                     | 440 | 210        | 230 | 37        | 36 | 29              | 35 | 7                  | 1 | 1              |   |
|                                                                                                           |     | 440        |     | 73/ 16,6% |    | 64/ 87,7%       |    | 8/ 11%             |   | 1/ 1,3%        |   |

  

| Prevalence and intensity of hookworm infection in inhabitants in Luang Namtha Province |     |            |     |          |    |                 |    |                    |   |                |   |
|----------------------------------------------------------------------------------------|-----|------------|-----|----------|----|-----------------|----|--------------------|---|----------------|---|
| Age group (year)                                                                       | N   | Sex number |     | Positive |    | Light intensity |    | Moderate intensity |   | High intensity |   |
|                                                                                        |     | M          | F   | M        | F  | M               | F  | M                  | F | M              | F |
| 2-5                                                                                    | 21  | 11         | 10  | 1        | 0  | 1               | 0  |                    |   |                |   |
| 6-10                                                                                   | 193 | 88         | 105 | 6        | 14 | 5               | 13 | 1                  | 1 |                |   |
| 11-14                                                                                  | 128 | 70         | 58  | 3        | 4  | 3               | 4  |                    |   |                |   |
| 15 <~                                                                                  | 98  | 41         | 57  |          | 1  |                 | 1  |                    |   |                |   |
| Total                                                                                  | 440 | 210        | 230 | 10       | 19 | 9               | 18 | 1                  | 1 |                |   |
|                                                                                        |     | 440        |     | 29/6,6%  |    | 27/93,1%        |    | 2/6,9%             |   |                |   |

  

| Prevalence and intensity of <i>Trichuris trichiura</i> infection in inhabitants in Luang Namtha Province |     |            |     |          |    |                 |    |                    |   |                |   |
|----------------------------------------------------------------------------------------------------------|-----|------------|-----|----------|----|-----------------|----|--------------------|---|----------------|---|
| Age group (year)                                                                                         | N   | Sex number |     | Positive |    | Light intensity |    | Moderate intensity |   | High intensity |   |
|                                                                                                          |     | M          | F   | M        | F  | M               | F  | M                  | F | M              | F |
| 2-5                                                                                                      | 21  | 11         | 10  |          |    |                 |    |                    |   |                |   |
| 6-10                                                                                                     | 193 | 88         | 105 | 13       | 9  | 13              | 9  |                    |   |                |   |
| 11-14                                                                                                    | 128 | 70         | 58  | 6        | 7  | 5               | 7  | 1                  |   |                |   |
| 15 <~                                                                                                    | 98  | 41         | 57  |          | 3  |                 | 3  |                    |   |                |   |
| Total                                                                                                    | 440 | 210        | 230 | 19       | 19 | 18              | 19 | 1                  |   |                |   |
|                                                                                                          |     | 440        |     | 38/8,6%  |    | 37/97,4%        |    | 1/2,6%             |   |                |   |

  

| Prevalence and intensity of miscellaneous trematodes infections in inhabitants in Oudomxay Province |     |            |     |          |   |                 |   |                    |   |                |   |
|-----------------------------------------------------------------------------------------------------|-----|------------|-----|----------|---|-----------------|---|--------------------|---|----------------|---|
| Age group (year)                                                                                    | N   | Sex number |     | Positive |   | Light intensity |   | Moderate intensity |   | High intensity |   |
|                                                                                                     |     | M          | F   | M        | F | M               | F | M                  | F | M              | F |
| 2-5                                                                                                 | 34  | 22         | 12  |          |   |                 |   |                    |   |                |   |
| 6-10                                                                                                | 278 | 138        | 140 |          |   |                 |   |                    |   |                |   |
| 11-14                                                                                               | 344 | 178        | 166 |          |   |                 |   |                    |   |                |   |
| 15 <~                                                                                               | 313 | 157        | 156 |          |   |                 |   |                    |   |                |   |
| Total                                                                                               | 969 | 495        | 474 |          |   |                 |   |                    |   |                |   |
|                                                                                                     |     | 969        |     | No       |   |                 |   |                    |   |                |   |

(continued)

SUPPLEMENTAL TABLE 1

Continued

| Prevalence and intensity of <i>Ascaris lumbricoides</i> infection in inhabitants in Oudomxay Province |     |            |     |          |    |                 |    |                    |   |                |   |
|-------------------------------------------------------------------------------------------------------|-----|------------|-----|----------|----|-----------------|----|--------------------|---|----------------|---|
| Age group (year)                                                                                      | N   | Sex number |     | Positive |    | Light intensity |    | Moderate intensity |   | High intensity |   |
|                                                                                                       |     | M          | F   | M        | F  | M               | F  | M                  | F | M              | F |
| 2-5                                                                                                   | 34  | 22         | 12  |          |    |                 |    |                    |   |                |   |
| 6-10                                                                                                  | 278 | 138        | 140 | 4        | 6  | 4               | 6  |                    |   |                |   |
| 11-14                                                                                                 | 344 | 178        | 166 | 2        | 4  | 2               | 4  |                    |   |                |   |
| 15 <~                                                                                                 | 313 | 157        | 156 | 4        | 7  | 4               | 7  |                    |   |                |   |
| Total                                                                                                 | 969 | 495        | 474 | 10       | 17 | 10              | 17 |                    |   |                |   |
|                                                                                                       |     | 969        |     | 27/2,8%  |    | 27/100%         |    |                    |   |                |   |

  

| Prevalence and intensity of hookworm infection in inhabitants in Oudomxay Province |     |            |     |            |     |                 |     |                    |   |                |   |
|------------------------------------------------------------------------------------|-----|------------|-----|------------|-----|-----------------|-----|--------------------|---|----------------|---|
| Age group (year)                                                                   | N   | Sex number |     | Positive   |     | Light intensity |     | Moderate intensity |   | High intensity |   |
|                                                                                    |     | M          | F   | M          | F   | M               | F   | M                  | F | M              | F |
| 2-5                                                                                | 34  | 22         | 12  | 6          | 2   | 6               | 2   |                    |   |                |   |
| 6-10                                                                               | 278 | 138        | 140 | 125        | 119 | 125             | 119 |                    |   |                |   |
| 11-14                                                                              | 344 | 178        | 166 | 119        | 110 | 119             | 110 |                    |   |                |   |
| 15 <~                                                                              | 313 | 157        | 156 | 82         | 70  | 82              | 70  |                    |   |                |   |
| Total                                                                              | 969 | 495        | 474 | 332        | 301 | 332             | 301 |                    |   |                |   |
|                                                                                    |     | 969        |     | 633/65,32% |     | 633/100%        |     |                    |   |                |   |

  

| Prevalence and intensity of <i>Trichuris trichiura</i> infection in inhabitants in Oudomxay Province |     |            |     |          |    |                 |    |                    |   |                |   |
|------------------------------------------------------------------------------------------------------|-----|------------|-----|----------|----|-----------------|----|--------------------|---|----------------|---|
| Age group (year)                                                                                     | N   | Sex number |     | Positive |    | Light intensity |    | Moderate intensity |   | High intensity |   |
|                                                                                                      |     | M          | F   | M        | F  | M               | F  | M                  | F | M              | F |
| 2-5                                                                                                  | 34  | 22         | 12  |          |    |                 |    |                    |   |                |   |
| 6-10                                                                                                 | 278 | 138        | 140 | 13       | 14 | 13              | 14 |                    |   |                |   |
| 11-14                                                                                                | 344 | 178        | 166 | 15       | 14 | 15              | 14 |                    |   |                |   |
| 15 <~                                                                                                | 313 | 157        | 156 | 9        | 11 | 9               | 11 |                    |   |                |   |
| Total                                                                                                | 969 | 495        | 474 | 37       | 39 | 37              | 39 |                    |   |                |   |
|                                                                                                      |     | 969        |     | 76/7,8%  |    | 76/100%         |    |                    |   |                |   |

  

| Prevalence and intensity of miscellaneous trematodes infections in inhabitants in Phongsaly Province |     |            |     |          |   |                 |   |                    |   |                |   |
|------------------------------------------------------------------------------------------------------|-----|------------|-----|----------|---|-----------------|---|--------------------|---|----------------|---|
| Age group (year)                                                                                     | N   | Sex number |     | Positive |   | Light intensity |   | Moderate intensity |   | High intensity |   |
|                                                                                                      |     | M          | F   | M        | F | M               | F | M                  | F | M              | F |
| 2-5                                                                                                  | 4   | 3          | 1   |          |   |                 |   |                    |   |                |   |
| 6-10                                                                                                 | 172 | 76         | 96  |          |   |                 |   |                    |   |                |   |
| 11-14                                                                                                | 278 | 147        | 131 |          |   |                 |   |                    |   |                |   |
| 15 <~                                                                                                | 234 | 103        | 131 |          |   |                 |   |                    |   |                |   |
| Total                                                                                                | 688 | 329        | 359 |          |   |                 |   |                    |   |                |   |
|                                                                                                      |     | 688        |     | No       |   |                 |   |                    |   |                |   |

  

| Prevalence and intensity of <i>Ascaris lumbricoides</i> infection in inhabitants in Phongsaly Province |     |            |     |           |    |                 |    |                    |   |                |   |
|--------------------------------------------------------------------------------------------------------|-----|------------|-----|-----------|----|-----------------|----|--------------------|---|----------------|---|
| Age group (year)                                                                                       | N   | Sex number |     | Positive  |    | Light intensity |    | Moderate intensity |   | High intensity |   |
|                                                                                                        |     | M          | F   | M         | F  | M               | F  | M                  | F | M              | F |
| 2-5                                                                                                    | 4   | 3          | 1   | 1         | 0  | 1               | 0  |                    |   |                |   |
| 6-10                                                                                                   | 172 | 76         | 96  | 8         | 24 | 8               | 21 | 0                  | 3 |                |   |
| 11-14                                                                                                  | 278 | 147        | 131 | 45        | 33 | 38              | 31 | 7                  | 2 |                |   |
| 15 <~                                                                                                  | 234 | 103        | 131 | 36        | 40 | 36              | 37 | 0                  | 3 |                |   |
| Total                                                                                                  | 688 | 329        | 359 | 90        | 97 | 83              | 89 | 7                  | 8 |                |   |
|                                                                                                        |     | 688        |     | 187/27,2% |    | 172/92%         |    | 15/8%              |   |                |   |

  

| Prevalence and intensity of hookworm infection in inhabitants in Phongsaly Province |     |            |     |           |    |                 |    |                    |   |                |   |
|-------------------------------------------------------------------------------------|-----|------------|-----|-----------|----|-----------------|----|--------------------|---|----------------|---|
| Age group (year)                                                                    | N   | Sex number |     | Positive  |    | Light intensity |    | Moderate intensity |   | High intensity |   |
|                                                                                     |     | M          | F   | M         | F  | M               | F  | M                  | F | M              | F |
| 2-5                                                                                 | 4   | 3          | 1   |           |    |                 |    |                    |   |                |   |
| 6-10                                                                                | 172 | 76         | 96  | 5         | 11 | 5               | 11 |                    |   |                |   |
| 11-14                                                                               | 278 | 147        | 131 | 31        | 26 | 31              | 26 |                    |   |                |   |
| 15 <~                                                                               | 234 | 103        | 131 | 21        | 20 | 21              | 20 |                    |   |                |   |
| Total                                                                               | 688 | 329        | 359 | 57        | 57 | 57              | 57 |                    |   |                |   |
|                                                                                     |     | 688        |     | 114/16,6% |    | 114/100%        |    |                    |   |                |   |

(continued)

SUPPLEMENTAL TABLE 1

Continued

| Prevalence and intensity of <i>Trichuris trichiura</i> infection in inhabitants in Phongsaly Province |     |            |     |           |     |                 |     |                    |   |                |   |
|-------------------------------------------------------------------------------------------------------|-----|------------|-----|-----------|-----|-----------------|-----|--------------------|---|----------------|---|
| Age group (year)                                                                                      | N   | Sex number |     | Positive  |     | Light intensity |     | Moderate intensity |   | High intensity |   |
|                                                                                                       |     | M          | F   | M         | F   | M               | F   | M                  | F | M              | F |
| 2-5                                                                                                   | 4   | 3          | 1   |           |     |                 |     |                    |   |                |   |
| 6-10                                                                                                  | 172 | 76         | 96  | 11        | 30  | 11              | 30  |                    |   |                |   |
| 11-14                                                                                                 | 278 | 147        | 131 | 42        | 39  | 42              | 39  |                    |   |                |   |
| 15 <~                                                                                                 | 234 | 103        | 131 | 32        | 37  | 32              | 37  |                    |   |                |   |
| Total                                                                                                 | 688 | 329        | 359 | 85        | 106 | 85              | 106 |                    |   |                |   |
|                                                                                                       |     | 688        |     | 191/27,8% |     | 191/100%        |     |                    |   |                |   |

  

| Prevalence and intensity of miscellaneous trematode infections in inhabitants in Bolikhamxay province |     |            |     |           |    |                 |    |                    |   |                |   |
|-------------------------------------------------------------------------------------------------------|-----|------------|-----|-----------|----|-----------------|----|--------------------|---|----------------|---|
| Age group (year)                                                                                      | N   | Sex number |     | Positive  |    | Light intensity |    | Moderate intensity |   | High intensity |   |
|                                                                                                       |     | M          | F   | M         | F  | M               | F  | M                  | F | M              | F |
| 2-5                                                                                                   | 37  | 22         | 15  | 0         | 0  | 0               | 0  | 0                  | 0 | 0              | 0 |
| 6-10                                                                                                  | 38  | 22         | 16  | 1         | 0  | 1               | 0  | 0                  | 0 | 0              | 0 |
| 11-14                                                                                                 | 49  | 25         | 24  | 2         | 1  | 2               | 1  | 0                  | 0 | 0              | 0 |
| <~15                                                                                                  | 487 | 237        | 250 | 73        | 58 | 60              | 54 | 12                 | 3 | 1              | 1 |
| Total                                                                                                 | 611 | 306        | 305 | 76        | 59 | 63              | 55 | 12                 | 3 | 1              | 1 |
|                                                                                                       |     | 611        |     | 135/22,1% |    | 118/ 87,4%      |    | 15/ 11,1%          |   | 2/ 1,5%        |   |

  

| Prevalence and intensity of <i>Ascaris lumbricoides</i> infection in inhabitants in Bolikhamxay Province |     |            |     |          |    |                 |    |                    |   |                |   |
|----------------------------------------------------------------------------------------------------------|-----|------------|-----|----------|----|-----------------|----|--------------------|---|----------------|---|
| Age group (year)                                                                                         | N   | Sex number |     | Positive |    | Light intensity |    | Moderate intensity |   | High intensity |   |
|                                                                                                          |     | M          | F   | M        | F  | M               | F  | M                  | F | M              | F |
| 2-5                                                                                                      | 37  | 22         | 15  | 2        | 4  | 2               | 4  | 0                  | 0 | 0              | 0 |
| 6-10                                                                                                     | 38  | 22         | 16  | 5        | 5  | 5               | 5  | 0                  | 0 | 0              | 0 |
| 11-14                                                                                                    | 49  | 25         | 24  | 3        | 4  | 3               | 4  | 0                  | 0 | 0              | 0 |
| <~15                                                                                                     | 487 | 237        | 250 | 8        | 27 | 8               | 27 | 0                  | 0 | 0              | 0 |
| Total                                                                                                    | 611 | 306        | 305 | 18       | 40 | 18              | 40 |                    |   |                |   |
|                                                                                                          |     | 611        |     | 58/ 9,5% |    | 58/ 100%        |    |                    |   |                |   |

  

| Prevalence and intensity of hookworm infection in inhabitants in Bolikhamxay Province |     |            |     |            |    |                 |    |                    |   |                |   |
|---------------------------------------------------------------------------------------|-----|------------|-----|------------|----|-----------------|----|--------------------|---|----------------|---|
| Age group (year)                                                                      | N   | Sex number |     | Positive   |    | Light intensity |    | Moderate intensity |   | High intensity |   |
|                                                                                       |     | M          | F   | M          | F  | M               | F  | M                  | F | M              | F |
| 2-5                                                                                   | 37  | 22         | 15  | 0          | 1  | 0               | 1  | 0                  | 0 | 0              | 0 |
| 6-10                                                                                  | 38  | 22         | 16  | 3          | 5  | 3               | 5  | 0                  | 0 | 0              | 0 |
| 11-14                                                                                 | 49  | 25         | 24  | 3          | 5  | 3               | 5  | 0                  | 0 | 0              | 0 |
| <~15                                                                                  | 487 | 237        | 250 | 53         | 57 | 53              | 57 | 0                  | 0 | 0              | 0 |
| Total                                                                                 | 611 | 306        | 305 | 59         | 68 | 59              | 68 | 0                  | 0 | 0              | 0 |
|                                                                                       |     | 611        |     | 127/ 20,8% |    | 127/ 100%       |    |                    |   |                |   |

  

| Prevalence and intensity of <i>Trichuris trichiura</i> infection in inhabitants in Bolikhamxay Province |     |            |     |          |   |                 |   |                    |   |                |   |
|---------------------------------------------------------------------------------------------------------|-----|------------|-----|----------|---|-----------------|---|--------------------|---|----------------|---|
| Age group (year)                                                                                        | N   | Sex number |     | Positive |   | Light intensity |   | Moderate intensity |   | High intensity |   |
|                                                                                                         |     | M          | F   | M        | F | M               | F | M                  | F | M              | F |
| 2-5                                                                                                     | 37  | 22         | 15  |          |   |                 |   |                    |   |                |   |
| 6-10                                                                                                    | 38  | 22         | 16  |          |   |                 |   |                    |   |                |   |
| 11-14                                                                                                   | 49  | 25         | 24  |          |   |                 |   |                    |   |                |   |
| <~15                                                                                                    | 487 | 237        | 250 | 1        | 2 |                 |   |                    |   |                |   |
| Total                                                                                                   | 611 | 306        | 305 | 1        | 2 |                 |   |                    |   |                |   |
|                                                                                                         |     | 611        |     | 3        |   |                 |   |                    |   |                |   |

  

| Prevalence and intensity of miscellaneous trematodes infections in inhabitants in Xieng Khouang Province |       |            |     |          |   |                 |   |                    |   |                |   |
|----------------------------------------------------------------------------------------------------------|-------|------------|-----|----------|---|-----------------|---|--------------------|---|----------------|---|
| Age group (year)                                                                                         | N     | Sex number |     | Positive |   | Light intensity |   | Moderate intensity |   | High intensity |   |
|                                                                                                          |       | M          | F   | M        | F | M               | F | M                  | F | M              | F |
| 2-5                                                                                                      | 76    | 42         | 34  |          |   |                 |   |                    |   |                |   |
| 6-10                                                                                                     | 240   | 130        | 110 |          |   |                 |   |                    |   |                |   |
| 11-14                                                                                                    | 279   | 149        | 130 |          |   |                 |   |                    |   |                |   |
| 15 <~                                                                                                    | 548   | 211        | 337 | 4        | 4 |                 |   |                    |   |                |   |
| Total                                                                                                    | 1,143 | 532        | 611 |          |   |                 |   |                    |   |                |   |
|                                                                                                          |       | 1,143      |     | 8/0,7%   |   |                 |   |                    |   |                |   |

(continued)

SUPPLEMENTAL TABLE 1

Continued

| Prevalence and intensity of <i>Ascaris lumbricoides</i> infection in inhabitants in Xieng Khouang Province |       |            |     |           |    |                 |    |                    |   |                |   |
|------------------------------------------------------------------------------------------------------------|-------|------------|-----|-----------|----|-----------------|----|--------------------|---|----------------|---|
| Age group (year)                                                                                           | N     | Sex number |     | Positive  |    | Light intensity |    | Moderate intensity |   | High intensity |   |
|                                                                                                            |       | M          | F   | M         | F  | M               | F  | M                  | F | M              | F |
| 2-5                                                                                                        | 76    | 42         | 34  | 8         | 4  | 8               | 4  |                    |   |                |   |
| 6-10                                                                                                       | 240   | 130        | 110 | 26        | 8  | 26              | 8  |                    |   |                |   |
| 11-14                                                                                                      | 279   | 149        | 130 | 25        | 33 | 25              | 33 |                    |   |                |   |
| 15 <~                                                                                                      | 548   | 211        | 337 | 45        | 45 | 45              | 45 |                    |   |                |   |
| Total                                                                                                      | 1,143 | 532        | 611 | 104       | 90 | 104             | 90 |                    |   |                |   |
|                                                                                                            |       | 1,143      |     | 194/16,9% |    | 194/100%        |    |                    |   |                |   |

  

| Prevalence and intensity of hookworm infection in inhabitants in Xieng Khouang Province |       |            |     |           |     |                 |     |                    |   |                |   |
|-----------------------------------------------------------------------------------------|-------|------------|-----|-----------|-----|-----------------|-----|--------------------|---|----------------|---|
| Age group (year)                                                                        | N     | Sex number |     | Positive  |     | Light intensity |     | Moderate intensity |   | High intensity |   |
|                                                                                         |       | M          | F   | M         | F   | M               | F   | M                  | F | M              | F |
| 2-5                                                                                     | 76    | 42         | 34  | 9         | 3   | 9               | 3   |                    |   |                |   |
| 6-10                                                                                    | 240   | 130        | 110 | 37        | 26  | 31              | 23  | 4                  | 2 | 2              | 1 |
| 11-14                                                                                   | 279   | 149        | 130 | 67        | 37  | 64              | 35  | 2                  | 1 | 1              | 1 |
| 15 <~                                                                                   | 548   | 211        | 337 | 139       | 134 | 139             | 134 |                    |   |                |   |
| Total                                                                                   | 1,143 | 532        | 611 | 252       | 200 | 243             | 195 | 6                  | 3 | 3              | 2 |
|                                                                                         |       | 1,143      |     | 452/39,5% |     | 438/96,9%       |     | 9/2%               |   | 5/1,1%         |   |

  

| Prevalence and intensity of <i>Trichuris trichiura</i> infection in inhabitants in Xieng Khouang Province |       |            |     |          |    |                 |   |                    |   |                |   |
|-----------------------------------------------------------------------------------------------------------|-------|------------|-----|----------|----|-----------------|---|--------------------|---|----------------|---|
| Age group (year)                                                                                          | N     | Sex number |     | Positive |    | Light intensity |   | Moderate intensity |   | High intensity |   |
|                                                                                                           |       | M          | F   | M        | F  | M               | F | M                  | F | M              | F |
| 2-5                                                                                                       | 76    | 42         | 34  | 0        | 1  |                 |   |                    |   |                |   |
| 6-10                                                                                                      | 240   | 130        | 110 | 1        | 5  |                 |   |                    |   |                |   |
| 11-14                                                                                                     | 279   | 149        | 130 | 0        | 4  |                 |   |                    |   |                |   |
| 15 <~                                                                                                     | 548   | 211        | 337 | 8        | 12 |                 |   |                    |   |                |   |
| Total                                                                                                     | 1,143 | 532        | 611 | 9        | 22 |                 |   |                    |   |                |   |
|                                                                                                           |       | 1,143      |     | 31/2,7%  |    |                 |   |                    |   |                |   |

  

| Prevalence and intensity of miscellaneous trematodes infections in inhabitants in Attapeu Province |     |            |     |            |     |                 |     |                    |   |                |   |
|----------------------------------------------------------------------------------------------------|-----|------------|-----|------------|-----|-----------------|-----|--------------------|---|----------------|---|
| Age group (year)                                                                                   | N   | Sex number |     | Positive   |     | Light intensity |     | Moderate intensity |   | High intensity |   |
|                                                                                                    |     | M          | F   | M          | F   | M               | F   | M                  | F | M              | F |
| 2-5                                                                                                | 25  | 10         | 15  | 3          | 0   | 3               | 0   | 0                  | 0 | 0              | 0 |
| 6-10                                                                                               | 125 | 64         | 61  | 7          | 10  | 7               | 10  | 0                  | 0 | 0              | 0 |
| 11-14                                                                                              | 121 | 58         | 63  | 7          | 9   | 7               | 8   | 0                  | 1 | 0              | 0 |
| 15 <~                                                                                              | 374 | 142        | 232 | 67         | 85  | 67              | 84  | 0                  | 1 | 0              | 0 |
| Total                                                                                              | 645 | 274        | 371 | 84         | 104 | 84              | 102 | 0                  | 2 | 0              | 0 |
|                                                                                                    |     | 645        |     | 188/29,14% |     | 186/98,93%      |     | 2/1,07%            |   | 0              |   |

  

| Prevalence and intensity of <i>Ascaris lumbricoides</i> infection in inhabitants in Attapeu Province |     |            |     |          |   |                 |   |                    |   |                |   |
|------------------------------------------------------------------------------------------------------|-----|------------|-----|----------|---|-----------------|---|--------------------|---|----------------|---|
| Age group (year)                                                                                     | N   | Sex number |     | Positive |   | Light intensity |   | Moderate intensity |   | High intensity |   |
|                                                                                                      |     | M          | F   | M        | F | M               | F | M                  | F | M              | F |
| 2-5                                                                                                  | 25  | 10         | 15  | 0        | 0 | 0               | 0 | 0                  | 0 | 0              | 0 |
| 6-10                                                                                                 | 125 | 64         | 61  | 0        | 0 | 0               | 0 | 0                  | 0 | 0              | 0 |
| 11-14                                                                                                | 121 | 58         | 63  | 0        | 0 | 0               | 0 | 0                  | 0 | 0              | 0 |
| 15 <~                                                                                                | 374 | 142        | 232 | 0        | 0 | 0               | 0 | 0                  | 0 | 0              | 0 |
| Total                                                                                                | 645 | 274        | 371 | 1        | 1 | 1               | 1 | 0                  | 0 | 0              | 0 |
|                                                                                                      |     | 645        |     | 2        |   | 2               |   | 0                  |   | 0              |   |

  

| Prevalence and intensity of hookworm infection in inhabitants in Attapeu Province |     |            |     |            |    |                 |    |                    |   |                |   |
|-----------------------------------------------------------------------------------|-----|------------|-----|------------|----|-----------------|----|--------------------|---|----------------|---|
| Age group (year)                                                                  | N   | Sex number |     | Positive   |    | Light intensity |    | Moderate intensity |   | High intensity |   |
|                                                                                   |     | M          | F   | M          | F  | M               | F  | M                  | F | M              | F |
| 2-5                                                                               | 25  | 10         | 15  | 0          | 0  | 0               | 0  | 0                  | 0 | 0              | 0 |
| 6-10                                                                              | 125 | 64         | 61  | 5          | 1  | 5               | 1  | 0                  | 0 | 0              | 0 |
| 11-14                                                                             | 121 | 58         | 63  | 8          | 5  | 8               | 5  | 0                  | 0 | 0              | 0 |
| 15 <~                                                                             | 374 | 142        | 232 | 35         | 48 | 35              | 48 | 0                  | 0 | 0              | 0 |
| Total                                                                             | 645 | 274        | 371 | 48         | 54 | 48              | 54 | 0                  | 0 | 0              | 0 |
|                                                                                   |     | 645        |     | 102/15,81% |    | 102/100%        |    | 0                  |   | 0              |   |

(continued)

SUPPLEMENTAL TABLE 1

Continued

| Prevalence and intensity of <i>Trichuris trichiura</i> infection in inhabitants in Attapeu Province |     |            |     |          |   |                 |   |                    |   |                |   |
|-----------------------------------------------------------------------------------------------------|-----|------------|-----|----------|---|-----------------|---|--------------------|---|----------------|---|
| Age group (year)                                                                                    | N   | Sex number |     | Positive |   | Light intensity |   | Moderate intensity |   | High intensity |   |
|                                                                                                     |     | M          | F   | M        | F | M               | F | M                  | F | M              | F |
| 2-5                                                                                                 | 25  | 10         | 15  | 0        | 0 | 0               | 0 | 0                  | 0 |                |   |
| 6-10                                                                                                | 125 | 64         | 61  | 1        | 0 | 1               | 0 | 0                  | 0 |                |   |
| 11-14                                                                                               | 121 | 58         | 63  | 0        | 1 | 0               | 0 | 0                  | 0 |                |   |
| 15 <~                                                                                               | 374 | 142        | 232 | 2        | 3 | 2               | 3 | 0                  | 1 |                |   |
| Total                                                                                               | 645 | 274        | 371 | 3        | 4 | 3               | 3 | 0                  | 1 |                |   |
|                                                                                                     |     | 645        |     | 7/ 1,1%  |   | 6/85,7%         |   | 1/14,3%            |   |                |   |

  

| Prevalence and intensity of <i>Schistosoma mekongi</i> infection in inhabitants in Champasak Province |      |            |     |          |   |                 |   |                    |   |                |   |
|-------------------------------------------------------------------------------------------------------|------|------------|-----|----------|---|-----------------|---|--------------------|---|----------------|---|
| Age group (year)                                                                                      | N    | Sex number |     | Positive |   | Light intensity |   | Moderate intensity |   | High intensity |   |
|                                                                                                       |      | M          | F   | M        | F | M               | F | M                  | F | M              | F |
| 2-5                                                                                                   | 29   | 20         | 9   | 2        |   | 1               | 0 |                    |   |                | 1 |
| 6-10                                                                                                  | 165  | 74         | 91  | 3        |   | 1               | 0 | 2                  |   |                |   |
| 11-14                                                                                                 | 245  | 118        | 127 | 1        | 1 | 1               | 0 |                    | 1 |                |   |
| 15 <~                                                                                                 | 637  | 279        | 358 |          | 2 | 0               | 2 |                    |   |                |   |
| Total                                                                                                 | 1076 | 491        | 585 | 6        | 3 | 3               | 2 | 2                  | 1 |                |   |
|                                                                                                       |      | 1076       |     | 9/0,8%   |   | 5/55,6%         |   | 3/ 33,3%           |   | 1/ 11,1%       |   |

  

| Prevalence and intensity of miscellaneous trematodes infections in inhabitants in Champasak Province |      |            |     |           |     |                 |     |                    |    |                |   |
|------------------------------------------------------------------------------------------------------|------|------------|-----|-----------|-----|-----------------|-----|--------------------|----|----------------|---|
| Age group (year)                                                                                     | N    | Sex number |     | Positive  |     | Light intensity |     | Moderate intensity |    | High intensity |   |
|                                                                                                      |      | M          | F   | M         | F   | M               | F   | M                  | F  | M              | F |
| 2-5                                                                                                  | 29   | 20         | 9   | 5         | 1   | 5               |     |                    | 1  |                |   |
| 6-10                                                                                                 | 165  | 74         | 91  | 20        | 26  | 19              | 24  | 1                  | 2  |                |   |
| 11-14                                                                                                | 245  | 118        | 127 | 31        | 34  | 28              | 30  | 3                  | 4  |                |   |
| 15 <~                                                                                                | 637  | 279        | 358 | 160       | 193 | 142             | 182 | 17                 | 11 |                | 1 |
| Total                                                                                                | 1076 | 491        | 585 | 216       | 254 | 194             | 236 | 21                 | 18 |                | 1 |
|                                                                                                      |      | 1076       |     | 470/43,7% |     | 430/91,5%       |     | 39/8,3%            |    | 1/0,2%         |   |

  

| Prevalence and intensity of <i>Ascaris lumbricoides</i> infection in inhabitants in Champasak Province |      |            |     |          |   |                 |   |                    |   |                |   |
|--------------------------------------------------------------------------------------------------------|------|------------|-----|----------|---|-----------------|---|--------------------|---|----------------|---|
| Age group (year)                                                                                       | N    | Sex number |     | Positive |   | Light intensity |   | Moderate intensity |   | High intensity |   |
|                                                                                                        |      | M          | F   | M        | F | M               | F | M                  | F | M              | F |
| 2-5                                                                                                    | 29   | 20         | 9   |          |   |                 |   |                    |   |                |   |
| 6-10                                                                                                   | 165  | 74         | 91  | 1        | 2 | 1               | 1 |                    |   |                | 1 |
| 11-14                                                                                                  | 245  | 118        | 127 | 1        | 1 |                 |   | 1                  | 1 |                |   |
| 15 <~                                                                                                  | 637  | 279        | 358 | 1        | 3 | 1               | 3 |                    |   |                |   |
| Total                                                                                                  | 1076 | 491        | 585 | 3        | 6 | 2               | 4 | 1                  | 1 |                | 1 |
|                                                                                                        |      | 1076       |     | 9/0,8%   |   | 6/66,7%         |   | 2/22,2%            |   | 1/11,1%        |   |

  

| Prevalence and intensity of hookworm infection in inhabitants in Champasak Province |      |            |     |            |    |                 |    |                    |   |                |   |
|-------------------------------------------------------------------------------------|------|------------|-----|------------|----|-----------------|----|--------------------|---|----------------|---|
| Age group (year)                                                                    | N    | Sex number |     | Positive   |    | Light intensity |    | Moderate intensity |   | High intensity |   |
|                                                                                     |      | M          | F   | M          | F  | M               | F  | M                  | F | M              | F |
| 2-5                                                                                 | 29   | 20         | 9   | 1          |    | 1               |    |                    |   |                |   |
| 6-10                                                                                | 165  | 74         | 91  | 9          | 4  | 9               | 4  |                    |   |                |   |
| 11-14                                                                               | 245  | 118        | 127 | 29         | 10 | 28              | 10 | 1                  |   |                |   |
| 15 <~                                                                               | 637  | 279        | 358 | 60         | 55 | 59              | 54 | 1                  | 1 |                |   |
| Total                                                                               | 1076 | 491        | 585 | 99         | 69 | 97              | 68 | 2                  | 1 |                |   |
|                                                                                     |      | 1076       |     | 168/15,61% |    | 165/98,2%       |    | 3/1,8%             |   |                |   |

  

| Prevalence and intensity of <i>Trichuris trichiura</i> infection in inhabitants in Champasak Province |      |            |     |          |   |                 |   |                    |   |                |   |
|-------------------------------------------------------------------------------------------------------|------|------------|-----|----------|---|-----------------|---|--------------------|---|----------------|---|
| Age group (year)                                                                                      | N    | Sex number |     | Positive |   | Light intensity |   | Moderate intensity |   | High intensity |   |
|                                                                                                       |      | M          | F   | M        | F | M               | F | M                  | F | M              | F |
| 2-5                                                                                                   | 29   | 20         | 9   |          |   |                 |   |                    |   |                |   |
| 6-10                                                                                                  | 165  | 74         | 91  |          |   |                 |   |                    |   |                |   |
| 11-14                                                                                                 | 245  | 118        | 127 | 1        | 1 | 1               | 1 |                    |   |                |   |
| 15 <~                                                                                                 | 637  | 279        | 358 | 3        | 2 | 3               | 2 |                    |   |                |   |
| Total                                                                                                 | 1076 | 491        | 585 | 4        | 3 | 4               | 3 |                    |   |                |   |
|                                                                                                       |      | 1076       |     | 7/0,7%   |   | 7/100%          |   |                    |   |                |   |

(continued)

SUPPLEMENTAL TABLE 1

Continued

| Prevalence and intensity of miscellaneous trematodes infections in inhabitants in Saravan Province |     |            |     |           |     |                 |     |                    |    |                |   |   |
|----------------------------------------------------------------------------------------------------|-----|------------|-----|-----------|-----|-----------------|-----|--------------------|----|----------------|---|---|
| Age group (year)                                                                                   | N   | Sex number |     | Positive  |     | Light intensity |     | Moderate intensity |    | High intensity |   |   |
|                                                                                                    |     | M          | F   | M         | F   | M               | F   | M                  | F  | M              | F |   |
| 2-5                                                                                                | 5   | 4          | 1   | 1         |     | 1               | 0   | 0                  | 0  | 0              | 0 | 0 |
| 6-10                                                                                               | 1   | 1          | 0   | 0         | 0   | 0               | 0   | 0                  | 0  | 0              | 0 | 0 |
| 11-14                                                                                              | 208 | 82         | 126 | 31        | 50  | 27              | 48  | 4                  | 2  | 0              | 0 | 0 |
| 15 <~                                                                                              | 410 | 151        | 259 | 100       | 174 | 90              | 159 | 10                 | 15 | 0              | 0 | 0 |
| Total                                                                                              | 624 | 238        | 386 | 132       | 224 | 118             | 207 | 14                 | 17 |                |   |   |
|                                                                                                    |     | 624        |     | 356/57,1% |     | 325/ 91,3%      |     | 31/8,7%            |    |                |   |   |

  

| Prevalence and intensity of <i>Ascaris lumbricoides</i> infection in inhabitants in Saravan Province |     |            |     |          |    |                 |    |                    |   |                |   |  |
|------------------------------------------------------------------------------------------------------|-----|------------|-----|----------|----|-----------------|----|--------------------|---|----------------|---|--|
| Age group (year)                                                                                     | N   | Sex number |     | Positive |    | Light intensity |    | Moderate intensity |   | High intensity |   |  |
|                                                                                                      |     | M          | F   | M        | F  | M               | F  | M                  | F | M              | F |  |
| 2-5                                                                                                  | 5   | 4          | 1   | 0        | 0  |                 |    |                    |   |                |   |  |
| 6-10                                                                                                 | 1   | 1          | 0   |          |    |                 |    |                    |   |                |   |  |
| 11-14                                                                                                | 208 | 82         | 126 | 6        | 9  | 6               | 9  |                    |   |                |   |  |
| 15 <~                                                                                                | 410 | 151        | 259 | 5        | 14 | 5               | 14 |                    |   |                |   |  |
| Total                                                                                                | 624 | 238        | 386 | 11       | 23 | 11              | 23 |                    |   |                |   |  |
|                                                                                                      |     | 624        |     | 34/5,4%  |    | 34/ 100%        |    |                    |   |                |   |  |

  

| Prevalence and intensity of hookworm infection in inhabitants in Saravan Province |     |            |     |            |    |                 |    |                    |   |                |        |  |
|-----------------------------------------------------------------------------------|-----|------------|-----|------------|----|-----------------|----|--------------------|---|----------------|--------|--|
| Age group (year)                                                                  | N   | Sex number |     | Positive   |    | Light intensity |    | Moderate intensity |   | High intensity |        |  |
|                                                                                   |     | M          | F   | M          | F  | M               | F  | M                  | F | M              | F      |  |
| 2-5                                                                               | 5   | 4          | 1   |            | 1  |                 | 1  |                    |   |                |        |  |
| 6-10                                                                              | 1   | 1          | 0   |            |    |                 |    |                    |   |                |        |  |
| 11-14                                                                             | 208 | 82         | 126 | 20         | 37 | 20              | 36 |                    |   |                | 1      |  |
| 15 <~                                                                             | 410 | 151        | 259 | 26         | 49 | 26              | 49 |                    |   |                |        |  |
| Total                                                                             | 624 | 238        | 386 | 46         | 87 | 46              | 86 |                    | 0 |                | 1      |  |
|                                                                                   |     | 624        |     | 133/ 21,3% |    | 132/99,2%       |    |                    |   |                | 1/0,8% |  |

  

| Prevalence and intensity of miscellaneous trematodes infections in inhabitants in Sekong Province |     |            |     |          |   |                 |   |                    |   |                |   |  |
|---------------------------------------------------------------------------------------------------|-----|------------|-----|----------|---|-----------------|---|--------------------|---|----------------|---|--|
| Age group (year)                                                                                  | N   | Sex number |     | Positive |   | Light intensity |   | Moderate intensity |   | High intensity |   |  |
|                                                                                                   |     | M          | F   | M        | F | M               | F | M                  | F | M              | F |  |
| 2-5                                                                                               | 30  | 22         | 8   | 0        | 0 | 0               | 0 |                    |   |                |   |  |
| 6-10                                                                                              | 266 | 138        | 128 | 3        | 1 | 3               | 1 |                    |   |                |   |  |
| 11-14                                                                                             | 217 | 105        | 112 | 1        | 1 | 1               | 1 |                    |   |                |   |  |
| 15 <~                                                                                             | 184 | 81         | 103 | 5        | 6 | 5               | 6 |                    |   |                |   |  |
| Total                                                                                             | 697 | 346        | 351 | 9        | 8 | 9               | 8 |                    |   |                |   |  |
|                                                                                                   |     | 697        |     | 17/2,43% |   | 17/100%         |   |                    |   |                |   |  |

  

| Prevalence and intensity of <i>Ascaris lumbricoides</i> infection in inhabitants in Sekong Province |     |            |     |            |    |                 |    |                    |   |                |   |  |
|-----------------------------------------------------------------------------------------------------|-----|------------|-----|------------|----|-----------------|----|--------------------|---|----------------|---|--|
| Age group (year)                                                                                    | N   | Sex number |     | Positive   |    | Light intensity |    | Moderate intensity |   | High intensity |   |  |
|                                                                                                     |     | M          | F   | M          | F  | M               | F  | M                  | F | M              | F |  |
| 2-5                                                                                                 | 30  | 22         | 8   | 2          | 0  | 2               | 0  |                    |   |                |   |  |
| 6-10                                                                                                | 266 | 138        | 128 | 21         | 22 | 21              | 22 |                    |   |                |   |  |
| 11-14                                                                                               | 217 | 105        | 112 | 15         | 10 | 15              | 10 |                    |   |                |   |  |
| 15 <~                                                                                               | 184 | 81         | 103 | 18         | 19 | 18              | 19 |                    |   |                |   |  |
| Total                                                                                               | 697 | 346        | 351 | 56         | 51 | 56              | 51 |                    |   |                |   |  |
|                                                                                                     |     | 697        |     | 107/15,35% |    | 107/100%        |    |                    |   |                |   |  |

  

| Prevalence and intensity of hookworm infection in inhabitants in Sekong Province |     |            |     |           |    |                 |    |                    |   |                |   |  |
|----------------------------------------------------------------------------------|-----|------------|-----|-----------|----|-----------------|----|--------------------|---|----------------|---|--|
| Age group (year)                                                                 | N   | Sex number |     | Positive  |    | Light intensity |    | Moderate intensity |   | High intensity |   |  |
|                                                                                  |     | M          | F   | M         | F  | M               | F  | M                  | F | M              | F |  |
| 2-5                                                                              | 30  | 22         | 8   | 0         | 3  | 0               | 3  |                    |   |                |   |  |
| 6-10                                                                             | 266 | 138        | 128 | 22        | 22 | 22              | 22 |                    |   |                |   |  |
| 11-14                                                                            | 217 | 105        | 112 | 11        | 8  | 11              | 8  |                    |   |                |   |  |
| 15 <~                                                                            | 184 | 81         | 103 | 13        | 10 | 13              | 10 |                    |   |                |   |  |
| Total                                                                            | 697 | 346        | 351 | 46        | 43 | 46              | 43 |                    |   |                |   |  |
|                                                                                  |     | 697        |     | 89/12,76% |    | 89/100%         |    |                    |   |                |   |  |

(continued)

SUPPLEMENTAL TABLE 1  
Continued

| Prevalence and intensity of <i>Trichuris trichiura</i> infection in inhabitants in Sekong Province |     |            |     |          |    |                 |    |                    |   |                |   |
|----------------------------------------------------------------------------------------------------|-----|------------|-----|----------|----|-----------------|----|--------------------|---|----------------|---|
| Age group (year)                                                                                   | N   | Sex number |     | Positive |    | Light intensity |    | Moderate intensity |   | High intensity |   |
|                                                                                                    |     | M          | F   | M        | F  | M               | F  | M                  | F | M              | F |
| 2-5                                                                                                | 30  | 22         | 8   | 0        | 0  | 0               | 0  |                    |   |                |   |
| 6-10                                                                                               | 266 | 138        | 128 | 8        | 5  | 8               | 5  |                    |   |                |   |
| 11-14                                                                                              | 217 | 105        | 112 | 5        | 1  | 5               | 1  |                    |   |                |   |
| 15 <~                                                                                              | 184 | 81         | 103 | 3        | 10 | 3               | 10 |                    |   |                |   |
| TOTal                                                                                              | 697 | 346        | 351 | 16       | 16 | 16              | 16 |                    |   |                |   |
|                                                                                                    |     | 697        |     | 32/4,6%  |    | 32/100%         |    |                    |   |                |   |

M = male; F = female
